# Supplementary material for: A National Active Case-Finding Program for Tuberculosis in Prisons, Peru, 2024
Source: bioRxiv or medRxiv preprint supplement (doi:10.1101/2024.11.08.24317002), 2024-11-11
Supplement: Supplementary file [file media-1.pdf]

**Supplemental Table.** Multivariable logistic regression analysis of demographic characteristics and risk factors for rifampicin-resistant TB among PDL with confirmed TB.

| Risk factor       | TB Confirmed (n) | RR-TB (%)  | OR (95% CI)        | <i>P</i> value | AOR (95% CI)       | <i>P</i> value |
|-------------------|------------------|------------|--------------------|----------------|--------------------|----------------|
| <b>Age</b>        |                  |            |                    |                |                    |                |
| 18-29             | 382              | 40 (10.5)  |                    |                |                    |                |
| 30-44             | 486              | 63 (13.0)  | 1.31 (0.86, 2.04)  | .215           | 1.18 (0.76, 1.85)  | .462           |
| 45-60             | 169              | 16 (9.5)   | 1.07 (0.56, 1.99)  | .830           | 0.97 (0.50, 1.82)  | .928           |
| ≥ 60              | 52               | 5 (9.6)    | 1.44 (0.46, 3.72)  | .482           | 1.32 (0.42, 3.45)  | .597           |
| <b>Sex</b>        |                  |            |                    |                |                    |                |
| Male              | 1081             | 123 (11.4) | 0.20 (0.01, 5.14)  | .260           | 0.15 (0.01, 3.99)  | .192           |
| Female            | 8                | 1 (12.5)   |                    |                |                    |                |
| <b>TB History</b> |                  |            |                    |                |                    |                |
| Yes               | 397              | 65 (16.4)  | 2.00 (1.36, 2.96)  | <.001          | 1.96 (1.32, 2.91)  | .001           |
| No                | 692              | 59 (8.5)   |                    |                |                    |                |
| TB Contact        | 556              | 56 (10.1)  | 0.61 (0.32, 1.11)  | .119           | 0.59 (0.31, 1.08)  | .103           |
| Peru Origin       | 1054             | 122 (11.6) | 2.72 (0.80, 17.02) | .176           | 2.25 (0.65, 14.21) | .279           |

Data are presented as no. (%) unless otherwise indicated. CI, confidence interval; PDL, persons deprived of liberty; TB, tuberculosis; RR-TB, rifampicin-resistant tuberculosis; OR, odds ratio; AOR, adjusted odds ratio; PDL, persons deprived of liberty.
